# Supplementary material for: Optimized Single-Step Recovery of Lipophilic and Hydrophilic Compounds from Raspberry, Strawberry and Blackberry Pomaces Using a Simultaneous Ultrasound-Enzyme-Assisted Extraction (UEAE)
Source: MDPI journal article supplement (doi:10.3390/antiox12101793), 2023-09-22
Supplement: s1 [file s1]

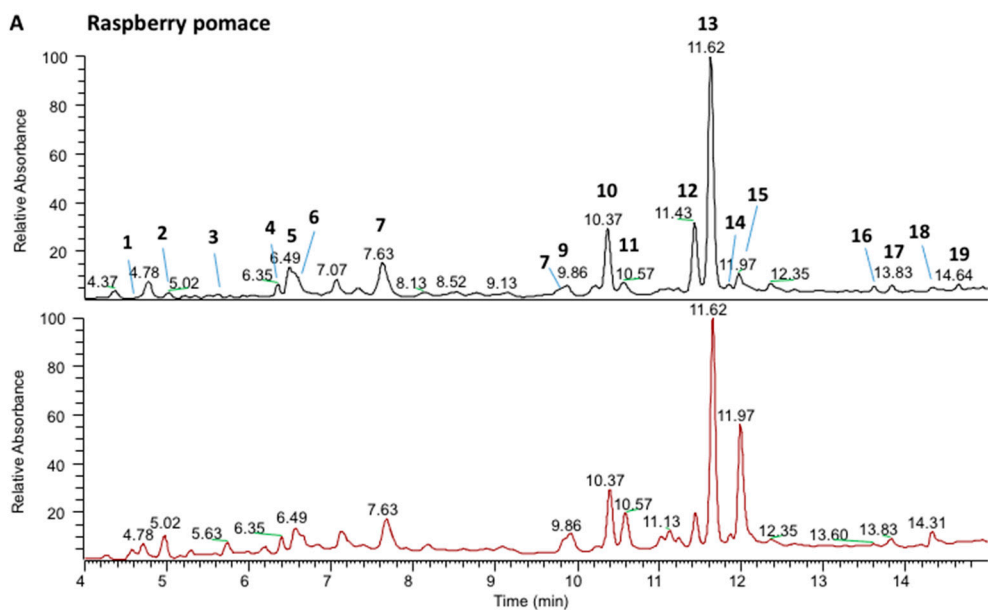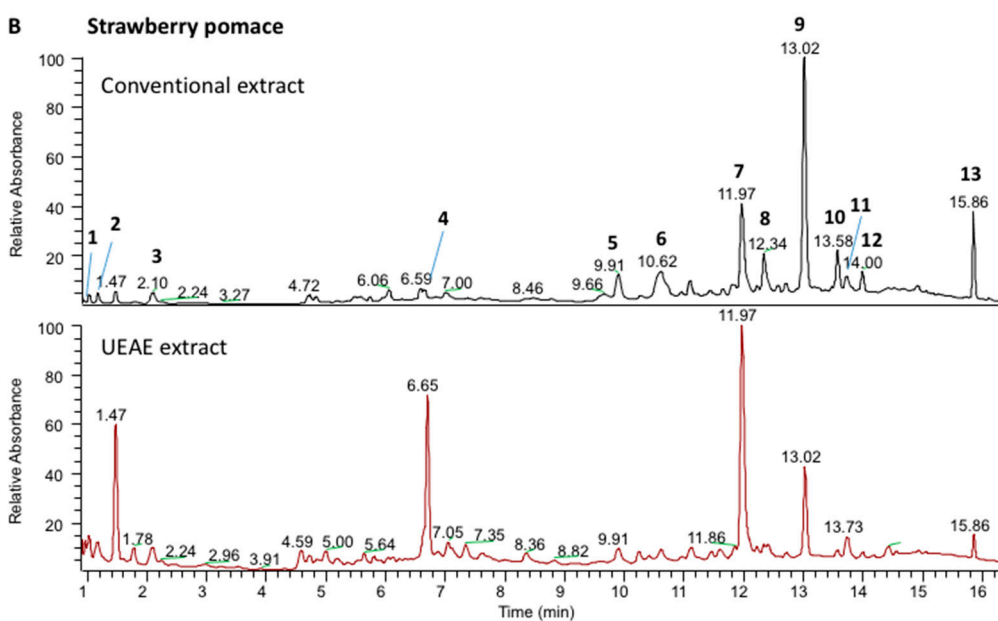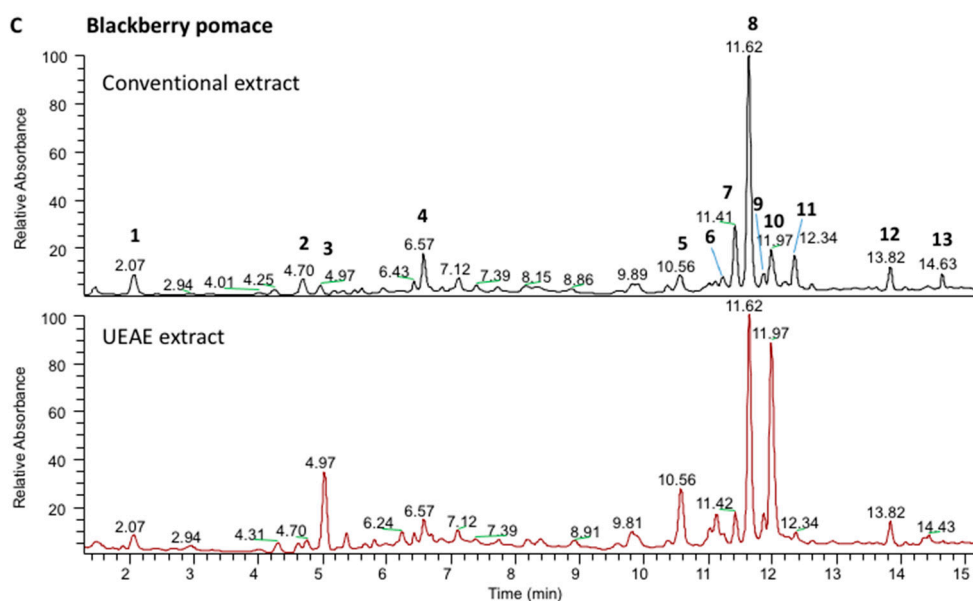

**Figure S1:** UV Chromatograms (280 nm) for UPLC-DAD-ESI-MS/MS identification of polyphenolic compounds in raspberry (A), strawberry (B) and blackberry (C) pomaces UAE and conventional extracts. Peak numbers refer to the identified phenolic compounds (Table 5).

**Table S1:** Composition of the lipidic fractions extracted from the raspberry, strawberry, and blackberry pomaces and UAE extracts.

|                                        | Raspberry<br>pomace    | UAE<br>raspberry<br>extract | Strawberry<br>pomace    | UAE<br>strawberry<br>extract | Blackberry<br>pomace    | UAE<br>blackberry<br>extract |
|----------------------------------------|------------------------|-----------------------------|-------------------------|------------------------------|-------------------------|------------------------------|
| Fatty acid profile <sup>1</sup>        |                        |                             |                         |                              |                         |                              |
| C16:0                                  | 3.8 ± 0.8 <sup>a</sup> | 3 ± 1 <sup>a</sup>          | 3.9 ± 0.6 <sup>a</sup>  | 5.8 ± 0.2 <sup>b</sup>       | 5.0 ± 0.2 <sup>a</sup>  | 5.1 ± 0.3 <sup>a</sup>       |
| C18:0                                  | 1.6 ± 0.3 <sup>a</sup> | 1.1 ± 0.3 <sup>a</sup>      | 1.2 ± 0.06 <sup>a</sup> | 2.0 ± 0.1 <sup>b</sup>       | 4.3 ± 0.3 <sup>a</sup>  | 4.3 ± 0.2 <sup>a</sup>       |
| C18:1                                  | 11 ± 2 <sup>a</sup>    | 11 ± 0.1 <sup>a</sup>       | 12 ± 0.9 <sup>a</sup>   | 14 ± 0.4 <sup>b</sup>        | 21 ± 2 <sup>a</sup>     | 21 ± 0.9 <sup>a</sup>        |
| C18:2                                  | 52 ± 7 <sup>a</sup>    | 53 ± 0.5 <sup>a</sup>       | 46 ± 4 <sup>a</sup>     | 45 ± 2 <sup>a</sup>          | 55 ± 5 <sup>a</sup>     | 55 ± 3 <sup>a</sup>          |
| C18:3                                  | 32 ± 5 <sup>a</sup>    | 32 ± 0.6 <sup>a</sup>       | 38 ± 4 <sup>a</sup>     | 32 ± 0.8 <sup>b</sup>        | 13 ± 2 <sup>a</sup>     | 13 ± 0.5 <sup>a</sup>        |
| C20:0                                  | ND                     | ND                          | ND                      | 1.3 ± 0.1                    | 1.5 ± 0.04 <sup>a</sup> | 1.3 ± 0.05 <sup>a</sup>      |
| SFA                                    | 5 ± 1 <sup>a</sup>     | 4 ± 2 <sup>a</sup>          | 5.1 ± 0.6 <sup>a</sup>  | 9.2 ± 0.3 <sup>b</sup>       | 11 ± 0.5 <sup>a</sup>   | 11 ± 0.5 <sup>a</sup>        |
| MUFA                                   | 11 ± 2 <sup>a</sup>    | 11 ± 0.1 <sup>a</sup>       | 12 ± 1 <sup>a</sup>     | 14 ± 0.4 <sup>a</sup>        | 21 ± 2 <sup>a</sup>     | 21 ± 0.9 <sup>a</sup>        |
| PUFA                                   | 83 ± 11 <sup>a</sup>   | 85 ± 2 <sup>a</sup>         | 78 ± 8 <sup>a</sup>     | 77 ± 2 <sup>a</sup>          | 68 ± 6 <sup>a</sup>     | 68 ± 3 <sup>a</sup>          |
| n-6/n-3 ratio                          | 1.6 ± 0.2 <sup>a</sup> | 1.7 ± 0.1 <sup>a</sup>      | 1.2 ± 0.2 <sup>a</sup>  | 1.4 ± 0.1 <sup>b</sup>       | 4.2 ± 0.1 <sup>a</sup>  | 4.2 ± 0.1 <sup>a</sup>       |
| Total tocol content <sup>2</sup>       | 249 ± 8 <sup>a</sup>   | 222 ± 16 <sup>a</sup>       | 66 ± 5 <sup>a</sup>     | 61 ± 5 <sup>a</sup>          | 390 ± 20 <sup>a</sup>   | 371 ± 10 <sup>a</sup>        |
| Tocol profile <sup>1</sup>             |                        |                             |                         |                              |                         |                              |
| α-tocopherol                           | 17 ± 0.7 <sup>a</sup>  | 18 ± 4 <sup>a</sup>         | 38 ± 5 <sup>a</sup>     | 39 ± 4 <sup>a</sup>          | 14 ± 0.3 <sup>a</sup>   | 16 ± 0.8 <sup>b</sup>        |
| γ-tocopherol                           | 76 ± 3 <sup>a</sup>    | 75 ± 4 <sup>a</sup>         | 62 ± 3 <sup>a</sup>     | 61 ± 5 <sup>a</sup>          | 73 ± 4 <sup>a</sup>     | 73 ± 3 <sup>a</sup>          |
| δ-tocopherol                           | 7.3 ± 0.4 <sup>a</sup> | 7.1 ± 0.6 <sup>a</sup>      | NQ                      | NQ                           | 13 ± 2 <sup>a</sup>     | 12 ± 0.3 <sup>a</sup>        |
| Total phytosterol content <sup>2</sup> | 1164 ± 7 <sup>a</sup>  | 927 ± 133 <sup>a</sup>      | 894 ± 23 <sup>a</sup>   | 665 ± 69 <sup>b</sup>        | 1074 ± 4 <sup>a</sup>   | 771 ± 5 <sup>b</sup>         |
| Phytosterol profile <sup>1</sup>       |                        |                             |                         |                              |                         |                              |
| β-sitosterol                           | 97 ± 0.8 <sup>a</sup>  | 98 ± 14 <sup>a</sup>        | 97 ± 3 <sup>a</sup>     | 97 ± 2 <sup>a</sup>          | 97 ± 0.5 <sup>a</sup>   | 96 ± 0.5 <sup>a</sup>        |
| Campesterol                            | 2.3 ± 0.3 <sup>a</sup> | 2.3 ± 0.3 <sup>a</sup>      | 3.5 ± 0.4 <sup>a</sup>  | 3 ± 0.2 <sup>a</sup>         | 3.4 ± 0.2 <sup>a</sup>  | 3.6 ± 0.2 <sup>a</sup>       |
| Stigmasterol                           | 0.8 ± 0.1              | NQ                          | NQ                      | NQ                           | NQ                      | NQ                           |

Mean values are expressed with standard deviations (n = 3).

SFA: saturated fatty acids; MUFA: mono-unsaturated fatty acids; PUFA: poly-unsaturated fatty acids; ND: not detected; NQ: not quantified.

<sup>1</sup>: Expressed as a percentage of the total fatty acid or tocol or phytosterol content.

<sup>2</sup>: Expressed in mg of compounds per 100 g of oil.

Anova (P < 0.05): two different letters mean that the results are significantly different.
